# Supplementary material for: Understanding factors influencing vulnerable older people keeping warm and well in winter: a qualitative study using social marketing techniques
Source: PubMed Central journal article supplement — BMJ Open. 2012 Jul 12;2(4):e000922. doi: 10.1136/bmjopen-2012-000922 (PMC3400059; doi:10.1136/bmjopen-2012-000922), 2012-07-12
Supplement: bmjopen-2012-000922-s2.pdf [file bmjopen-2012-000922-s2.pdf]

Research checklist: Keeping warm and well in later life: a qualitative study

| No                                                     | Item                                     | Guide questions/description                                                                                               |
|--------------------------------------------------------|------------------------------------------|---------------------------------------------------------------------------------------------------------------------------|
| <b>Domain 1:<br/>Research team<br/>and reflexivity</b> |                                          |                                                                                                                           |
| Personal Characteristics                               |                                          |                                                                                                                           |
| 1.                                                     | Interviewer/facilitator                  | Which author/s conducted the interview or focus group?<br><br>AT, AL, CH                                                  |
| 2.                                                     | Credentials                              | What were the researcher's credentials? <i>PI qualifications PhD MSc, MMedSci, Ba, RGN</i>                                |
| 3.                                                     | Occupation                               | What was their occupation at the time of the study?<br>Researcher                                                         |
| 4.                                                     | Gender                                   | Was the researcher male or female? <i>Female</i>                                                                          |
| 5.                                                     | Experience and training                  | What experience or training did the researcher have? <i>PhD. Over 15 years experience as a health services researcher</i> |
| Relationship with participants                         |                                          |                                                                                                                           |
| 6.                                                     | Relationship established                 | Was a relationship established prior to study commencement?<br><i>No</i>                                                  |
| 7.                                                     | Participant knowledge of the interviewer | What did the participants know about the researcher? <i>Research goals, reasons for doing the research, outputs</i>       |

| No                                | Item                                  | Guide questions/description                                                                                                           |
|-----------------------------------|---------------------------------------|---------------------------------------------------------------------------------------------------------------------------------------|
| 8.                                | Interviewer characteristics           | What characteristics were reported about the interviewer/facilitator? e.g. <i>Reasons and interests in the research topic</i>         |
| <b>Domain 2:<br/>study design</b> |                                       |                                                                                                                                       |
| Theoretical framework             |                                       |                                                                                                                                       |
| 9.                                | Methodological orientation and Theory | What methodological orientation was stated to underpin the study? <i>Qualitative inquiry, framework analysis and social marketing</i> |
| Participant selection             |                                       |                                                                                                                                       |
| 10.                               | Sampling                              | How were participants selected? <i>e.g. purposive and snowball</i>                                                                    |
| 11.                               | Method of approach                    | How were participants approached? e.g. <i>Older people face-to-face via trusted contact. Staff by telephone, mail, email</i>          |
| 12.                               | Sample size                           | How many participants were in the study? <i>50 older people and 25 staff</i>                                                          |
| 13.                               | Non-participation                     | How many people refused to participate or dropped out? <i>No drop out</i>                                                             |
| Setting                           |                                       |                                                                                                                                       |
| 14.                               | Setting of data collection            | Where was the data collected? <i>e.g. home, and workplace</i>                                                                         |
| 15.                               | Presence of non-participants          | Was anyone else present besides the participants and researchers? <i>No</i>                                                           |

| No              | Item                   | Guide questions/description                                                                                                  |
|-----------------|------------------------|------------------------------------------------------------------------------------------------------------------------------|
| 16.             | Description of sample  | What are the important characteristics of the sample?<br><i>e.g. age, gender</i>                                             |
| Data collection |                        |                                                                                                                              |
| 17.             | Interview guide        | Were questions, prompts, guides provided by the authors?<br><i>Examples of questions and list of issues covered provided</i> |
| 18.             | Repeat interviews      | Were repeat interviews carried out? <i>No</i>                                                                                |
| 19.             | Audio/visual recording | Did the research use audio or visual recording to collect the data? <i>Audio</i>                                             |
| 20.             | Field notes            | Were field notes made during and/or after the interview or focus group? <i>Yes</i>                                           |
| 21.             | Duration               | What was the duration of the interviews or focus group? <i>20-60 mins</i>                                                    |
| 22.             | Data saturation        | Was data saturation discussed?<br><i>No, not a grounded theory study</i>                                                     |
| 23.             | Transcripts returned   | Were transcripts returned to participants for comment and/or correction? <i>No</i>                                           |

**Domain 3:  
analysis and  
findingsz**

Data analysis

|     |                                |                                                                                                                      |
|-----|--------------------------------|----------------------------------------------------------------------------------------------------------------------|
| 24. | Number of data coders          | How many data coders coded the data? <i>4</i>                                                                        |
| 25. | Description of the coding tree | Did authors provide a description of the coding tree?<br><i>Thematic framework summary used to present findings.</i> |

| No        | Item                         | Guide questions/description                                                                                                                         |
|-----------|------------------------------|-----------------------------------------------------------------------------------------------------------------------------------------------------|
|           |                              | <i>Segmentation model given</i>                                                                                                                     |
| 26.       | Derivation of themes         | Were themes identified in advance or derived from the data? <i>Initial thematic framework developed a priori and then developed during analysis</i> |
| 27.       | Software                     | What software, if applicable, was used to manage the data?<br><i>NVIVO</i>                                                                          |
| 28.       | Participant checking         | Did participants provide feedback on the findings? <i>Some attended the consultation event</i>                                                      |
| Reporting |                              |                                                                                                                                                     |
| 29.       | Quotations presented         | Were participant quotations presented to illustrate the themes / findings? Was each quotation identified? <i>Yes</i>                                |
| 30.       | Data and findings consistent | Was there consistency between the data presented and the findings? <i>Yes</i>                                                                       |
| 31.       | Clarity of major themes      | Were major themes clearly presented in the findings? <i>Yes</i>                                                                                     |
| 32.       | Clarity of minor themes      | Is there a description of diverse cases or discussion of minor themes? <i>NO</i>                                                                    |
